# Supplementary material for: Transcriptome sequences spanning key developmental states as a resource for the study of the cestode Schistocephalus solidus, a threespine stickleback parasite
Source: PubMed Central journal article supplement (PMC4891850; doi:10.1186/s13742-016-0128-3), 2016-06-02

Sequence similarity comparison between the *de novo* transcriptome and the genome

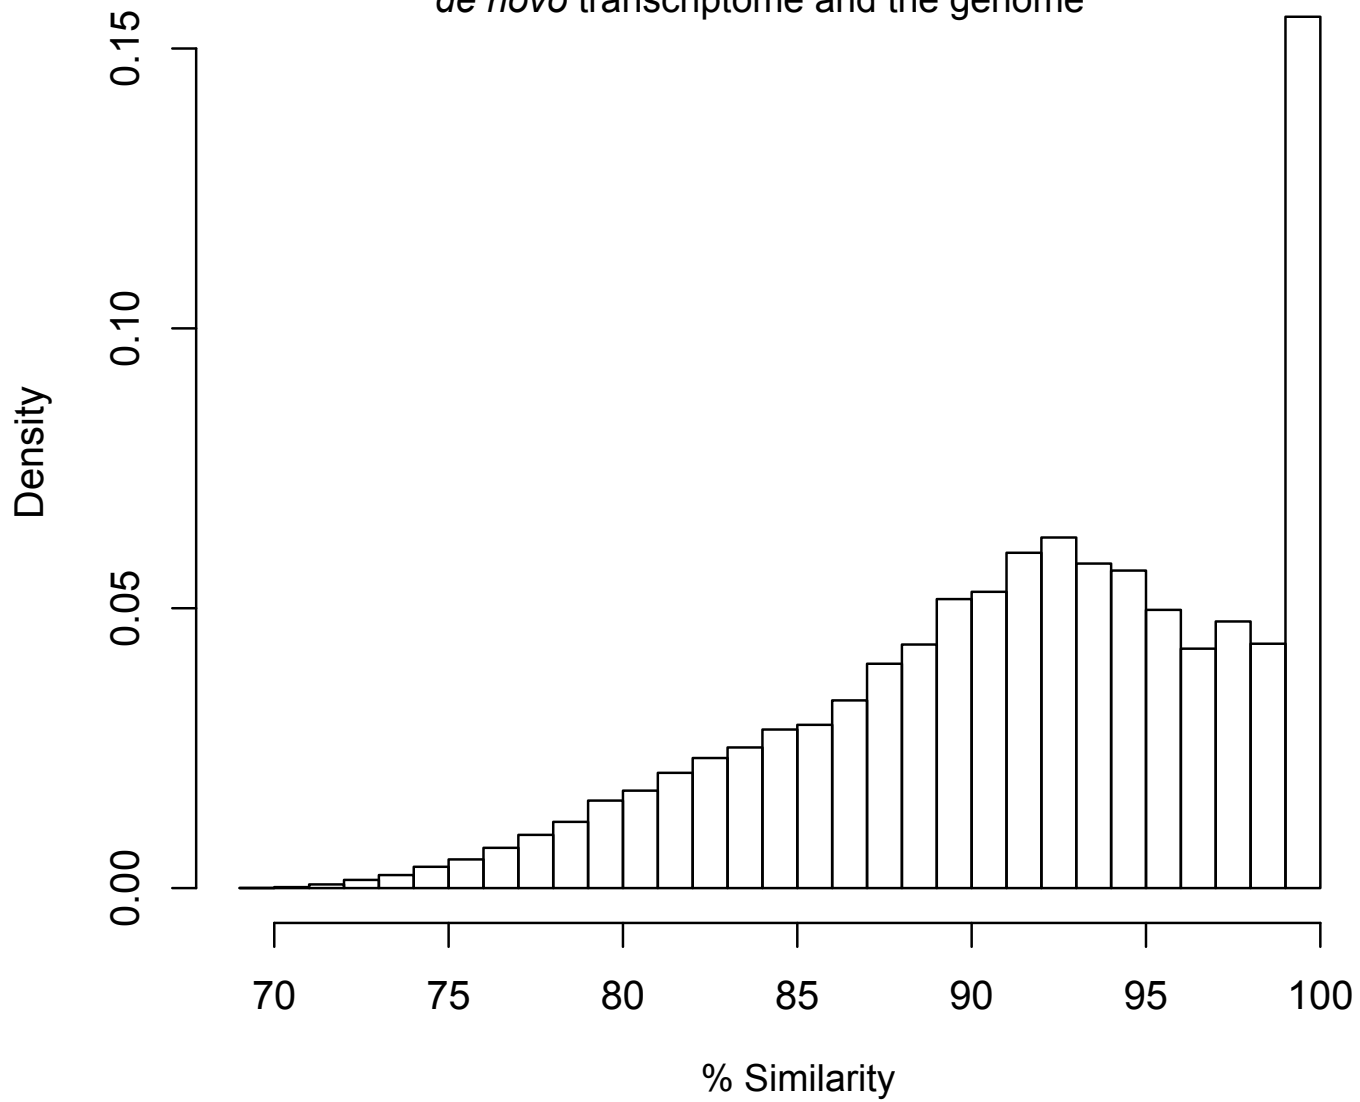

Supplement: 13742_2016_128_MOESM1_ESM.pdf [file 13742_2016_128_MOESM1_ESM.pdf]
